# Supplementary material
Source: Royal Society of Chemistry journal article supplement (doi:10.1039/d6cc01881e)
Supplement: d6cc01881e1.pdf [file d6cc01881e1.pdf]

## **Defect-Rich Carbon Supported Pt Nanoparticles via Joule Heating for Enhanced Oxygen Reduction**

Muhammad Hamza,<sup>a</sup> Song Lu,<sup>b</sup> Xueyan Jiao,<sup>a</sup> Bobo Zhao,<sup>a</sup> Wei Wang,<sup>a</sup> Bingchen Yin,<sup>a</sup> Lipiao Bao,<sup>a</sup> Xing Lu<sup>a</sup> and Kun Guo<sup>\*a</sup>

<sup>a</sup> *State Key Laboratory of New Textile Materials and Advanced Processing, and School of Materials Science and Engineering, Huazhong University of Science and Technology, Wuhan 430074, China*

<sup>b</sup> *Institute of New Energy, School of Chemistry and Chemical Engineering, Shaoxing University, Shaoxing 312000, China*

\*Corresponding author:

K. Guo ([guok@hust.edu.cn](mailto:guok@hust.edu.cn))

## Table of Contents

|                                                                                                                                                                                                                        |    |
|------------------------------------------------------------------------------------------------------------------------------------------------------------------------------------------------------------------------|----|
| <b>Experimental Section</b> .....                                                                                                                                                                                      | 3  |
| <b>Figure S1.</b> (a) Deconvolution of the Raman spectra of the carbon supported Pt NPs into D1, D2, D3, and G bands. (b) Corresponding areal ratios of the four deconvoluted bands. ....                              | 7  |
| <b>Figure S2.</b> N <sub>2</sub> adsorption–desorption isotherms and corresponding BET SSAs of FC (a), KB (b), and CNT (c). ....                                                                                       | 8  |
| <b>Figure S3.</b> Full-survey XPS spectra of Pt/FC, Pt/KB, Pt/CNT, Pt/GNP, and c-Pt/C. ....                                                                                                                            | 9  |
| <b>Table S1.</b> The elemental contents of C and Pt from the XPS measurements. ....                                                                                                                                    | 10 |
| <b>Figure S4.</b> The correlation between $I_D/I_G$ ratio and $sp^3/sp^2$ areal ratio of Pt/FC, Pt/KB, Pt/CNT, and Pt/GNP. ....                                                                                        | 11 |
| <b>Table S2.</b> Comparison of ORR activity of Pt/FC in this study with recently reported Pt-based catalysts in alkaline electrolytes.....                                                                             | 12 |
| <b>Figure S5.</b> ORR polarization plots at different rotating speeds of 400–2000 rpm and the derived K–L plot (insets) and average $n$ values of Pt/KB (a), Pt/CNT (b), Pt/GNP (c), and c-Pt/C (d). ....              | 13 |
| <b>Figure S6.</b> HO <sub>2</sub> <sup>-</sup> yield and $n$ value derived from the RRDE tests of Pt/KB (a), Pt/CNT (b), and Pt/GNP (c). ....                                                                          | 14 |
| <b>Figure S7.</b> CV curves of Pt/KB (a), Pt/CNT (b), Pt/GNP (c), and c-Pt/C (d) in Ar-saturated HClO <sub>4</sub> . The colored area denoting the hydrogen adsorption region is integrated for ECSA calculation. .... | 15 |
| <b>Figure S8.</b> Front (a) and top (b) views of the atomic models of a Pt <sub>12</sub> cluster supported on graphene with (left) and without (right) a pentagon defect.....                                          | 16 |
| <b>Table S3.</b> Comparison of the transferred electron numbers of the five Pt atoms that are adjacent to the graphene support with and without pentagon.....                                                          | 17 |
| <b>References</b> .....                                                                                                                                                                                                | 18 |

## Experimental Section

### 1. Chemicals

All chemicals were purchased unless otherwise indicated and used as received without further treatment. Platinum (II) acetylacetonate ( $\text{Pt}(\text{acac})_2$ ,  $\geq 98\%$ ), potassium hydroxide ( $\text{KOH}$ ,  $\geq 85.0\%$ ), sulfuric acid ( $\text{H}_2\text{SO}_4$ , 96%), perchloric acid ( $\text{HClO}_4$ , 70%), toluene ( $\geq 99.5\%$ ), ethanol (99.7%), and acetone ( $\geq 99\%$ ) were ordered from Sinopharm Chemical Reagent Co., Ltd. Nafion ionomer solution (5 wt.%) and platinum on activated carbon (20 wt.% Pt/C) were obtained from Sigma Aldrich.  $\text{C}_{60}$  fullerene (99%) was purchased from Xiamen Funano New Material Technology Co., Ltd. Ketjenblack EC-600 JD (KB) carbon black was ordered from AkzoNobel. Carbon nanotubes (CNT, multi-walled, 95%, length of 10–30  $\mu\text{m}$  and diameter of 10–20 nm) were received from Nanjing XFNANO Materials Tech Co., Ltd. Graphitic nanoplatelets (GNPs, product No. HXGOP-90) were supplied by Wuhan Hanene Technology Co., Ltd. Deionized water (18.2  $\text{M}\Omega\cdot\text{cm}$ ) was used in all the experiments.

### 2. Materials Synthesis

#### Synthesis of fullerene-derived carbon (FC)

For the preparation of FC, 200 mg of  $\text{C}_{60}$  and 2.4 g of  $\text{KOH}$  were dissolved in 100 mL of toluene and 50 mL of ethanol, respectively. The  $\text{KOH}$  solution was then poured into the  $\text{C}_{60}$  solution and stirred vigorously for 2 h. Afterwards, the mixture was stirred and heated at 115  $^\circ\text{C}$  until the organic solvents were completely evaporated. The collected dark brown powder was then transferred to a ceramic cauldron and calcined at 700  $^\circ\text{C}$  for 30 minutes in a nitrogen stream in a tube furnace. The resulting black powder was manually ground and dispersed in 0.5 M  $\text{H}_2\text{SO}_4$  for 8 h to remove residual alkali and impurities. The product was collected in a centrifuge and washed with ultra-pure water until the solution became pH-neutral. The dry sample was then heated for a second time in a nitrogen stream at 900  $^\circ\text{C}$  for 1 h to obtain the final powder product of FC.

#### Synthesis of carbon supported Pt nanoparticles (NPs)

For the preparation of FC supported Pt NPs (Pt/FC), 10 mg of  $\text{Pt}(\text{acac})_2$  was fully dissolved in 10 mL of acetone, into which 43.8 mg of FC (a nominal Pt loading of 10 wt.%) was dispersed to form a uniform dark black suspension. The nominal loading of Pt on FC was 10 wt.%. Then, acetone was removed using a rotary evaporator and the dry black powder was thoroughly grounded. The fine powder was rapidly heated to  $1830 \pm 70$   $^\circ\text{C}$  in 1.5s using a Joule heating furnace (Hefei In-situ Technology Co., LTD.) at a

voltage of 40 V and a current of 375 A to obtain Pt/FC. Pt/KB, Pt/CNT, and Pt/GNP were prepared via the same procedures except that FC was replaced by the same amount of KB, CNT, and GNP, respectively.

### 3. Material Characterization

Transmission electron microscopy (TEM) was carried out on a JEM-2010F (JEOL) electron microscope at an accelerating voltage of 200 kV. A copper grid coated with a thin carbon film was used as the specimen holder. Scanning electron microscopy (SEM) was performed on a Nova NanoSEM 450 (FEI) electron microscope at an accelerating voltage of 10 kV.

X-ray powder diffraction (XRD) was performed to obtain the crystallographic information of the samples. The powder diffraction patterns were recorded on a Malvern Panalytical X-ray diffractometer (Empyrean) using Cu K $\alpha$  radiation source ( $\lambda = 1.5406 \text{ \AA}$ , 45 kV and 40 mA). Scanning angles for all samples were set in the  $2\theta$  range of 5–90° with a step size of 0.01313° and time per step of 120 s. Peaks were indexed to the database established by Joint Committee on Powder Diffraction Standards (JCPDS).

Raman spectrum was acquired using a confocal Raman microscope (LabRAM HR800, Horiba JobinYvon) equipped with an optical microscope, a CCD camera, and an argon ion laser source. The laser provided 0.2 mW power at a wavelength of 532 nm for the exciting line. Integration time was 60 s, number of co-addition was 2, and slit aperture size was 50×1000  $\mu\text{m}$ .

X-ray photoelectron spectroscopy (XPS) analysis was performed on the K-Alpha X-ray photoelectron spectrometer system (Thermo Fisher Scientific) utilizing a monochromatic Al K $\alpha$  source (1486.69 eV). High-resolution spectra were obtained at a pass energy of 50.0 eV, a step size of 0.1 eV, and a dwell time of 250 ms per step. The analysis spot size was 400  $\mu\text{m}$ . All binding energies were calibrated to the graphitic C 1s peak at 284.8 eV. XPS peaks were deconvolved and curve-fitted on the CasaXPS software using the Gaussian–Lorentzian mix/Lorentzian asymmetric function and Shirley background.

Nitrogen adsorption–desorption measurements were conducted at the liquid nitrogen temperature of 77 K on a Micromeritics TriStar II surface area and porosity analyzer after degassing under vacuum at 80 °C for 12 h using a sample degas system (Micromeritics VacPrep 061). Specific surface area was calculated using the Brunauer–Emmett–Teller (BET) method.

### 4. Electrochemical Measurements

All the electrochemical measurements were conducted on a CHI760E electrochemical workstation

(Shanghai Chenhua Instruments Co., Ltd., China) and a MSR rotator (Pine Instrument Company, USA) in a standard three-electrode cell at room temperature. A glassy carbon rotating disk electrode (RDE, diameter of 5 mm), an Ag/AgCl in saturated KCl electrode and a platinum foil/graphite rod were used as the working, reference, and counter electrodes, respectively. All the potential given was calibrated to the reversible hydrogen electrode (RHE) according to the Nernst equation  $E_{vs\ RHE} = E_{vs\ Ag/AgCl} + 0.198 + 0.0592 \times \text{pH}$ . 0.1 M KOH aqueous solution was used as the electrolyte.

The working electrode was fabricated via the following procedures: 5 mg of the as-prepared catalyst was dispersed in a mixture of 960  $\mu\text{L}$  of ethanol and 40  $\mu\text{L}$  of 5 wt % Nafion solution. The mixture was ultrasonically dispersed for at least 0.5 h to obtain a homogeneous suspension. Then 20  $\mu\text{L}$  of the suspension was taken by a microsyringe and drop-casted onto a clean RDE with an overall loading of 0.25  $\text{mg cm}^{-2}$ . The modified RDE was dried naturally in air. Prior to the tests, the electrochemical cell was saturated by purging Ar or O<sub>2</sub> for at least 30 min. The linear sweep voltammetry (LSV) scan potential was set from 1.2 to 0 V, the scan rate was 10  $\text{mV s}^{-1}$ , and the rotational speeds were 400–1600 rpm. Before the LSV test, cyclic voltammetry (CV) was conducted for 5 cycles in the potential range of 0–1.2 V at a scan rate of 20  $\text{mV s}^{-1}$  to activate the catalyst. CV was also conducted for 3 cycles in the potential range of 0.05–1.0 V at a scan rate of 20  $\text{mV s}^{-1}$  in Ar-saturated 0.1 M HClO<sub>4</sub> to measure the electrochemically-active surface area (ECSA). Accelerated stress test (AST) was conducted by potential sweeps between 0.6 V and 1.0 V at a scan rate of 100  $\text{mV s}^{-1}$ . Long-term durability was measured using the chronoamperometric technique at 0.6 V and 1600 rpm for 20 h.

Kinetic current density ( $j_K$ ) was calculated according to the following equation:

$$j_K = \frac{j_L j}{j_L - j} \quad (1)$$

where  $j$  and  $j_L$  are the measured and diffusion-limited current densities, respectively.

Electron transfer number ( $n$ ) was calculated according to the Koutecky–Levich (K–L) equation as follows:

$$\frac{1}{j} = \frac{1}{j_L} + \frac{1}{j_K} = \frac{1}{B\omega^{1/2}} + \frac{1}{j_K} \quad (2)$$

$$B = 0.2nFC_0(D_0)^{2/3}\nu^{-1/6} \quad (3)$$

where  $\omega$  is the electrode rotational speed in the unit of rpm,  $F$  is the Faraday constant (96,485  $\text{C mol}^{-1}$ ),

$C_0$  is the bulk concentration of  $O_2$  in 0.1 M KOH ( $1.2 \times 10^{-6}$  mol  $cm^{-3}$ ),  $D_0$  is the diffusion coefficient of  $O_2$  in 0.1 M KOH ( $1.9 \times 10^{-5}$   $cm^2 s^{-1}$ ), and  $\nu$  is the kinetic viscosity of the electrolyte ( $0.01$   $cm^2 s^{-1}$ ).

The rotating ring-disk electrode (RRDE) measurements were conducted in  $O_2$ -saturated 0.1 M KOH at 1600 rpm and a scan rate of  $10$   $mV s^{-1}$ . The ring potential was set as  $1.3$  V. The  $n$  value and peroxide yield ( $HO_2^-$ ) were calculated by the following equations:

$$HO_2^-(\%) = 200 \times \frac{I_r/N}{I_d + I_r/N} \quad (4)$$

$$n = 4 \times \frac{I_d}{I_d + I_r/N} \quad (5)$$

where  $I_r$  and  $I_d$  are the ring and disk currents, respectively, and  $N$  is the current collection efficiency of RRDE (0.37).

ECSA value was determined by integrating of the hydrogen adsorption region integrated from  $0.05$  V to  $0.4$  V. The final cycle of a set of three cycles was used for data analysis. The ECSA ( $m^2 g_{Pt}^{-1}$ ) was calculated using the following equation:

$$ECSA = \frac{Q_H}{q_H \cdot M_{Pt}} \quad (6)$$

where  $Q_H$  is the integrated charge for hydrogen adsorption,  $M_{Pt}$  is the mass loading of Pt, and  $q_H$  equals to  $210 \mu C cm^{-2}$ , corresponding to the charge of a hydrogen monolayer adsorbed on polycrystalline Pt.

## 5. Theoretical Calculation Details

The density functional theory (DFT) calculations were conducted with the projector-augmented wave method implemented in the Vienna ab initio Simulation Package.<sup>[S1,2]</sup> Intact graphene and graphene with a pentagonal defect were employed as the carbon supports, onto which a 12-atom Pt cluster was introduced. A vacuum of  $18 \text{ \AA}$  was imposed in the Z direction. The Perdew-Burke-Ernzerhof within the generalized gradient approximation was utilized as an exchange-correlation functional.<sup>[S3]</sup> A plane-wave cutoff energy of  $450$  eV was set for all the computations to describe all atoms' valence electrons. The convergence criterion of energy and force was set to  $10^{-4}$  eV and  $0.02$  eV  $\text{\AA}^{-1}$ , respectively. G-centered  $2 \times 2 \times 1$  and  $4 \times 4 \times 1$  k-points grids were chosen for optimization and electronic structure calculations, respectively.

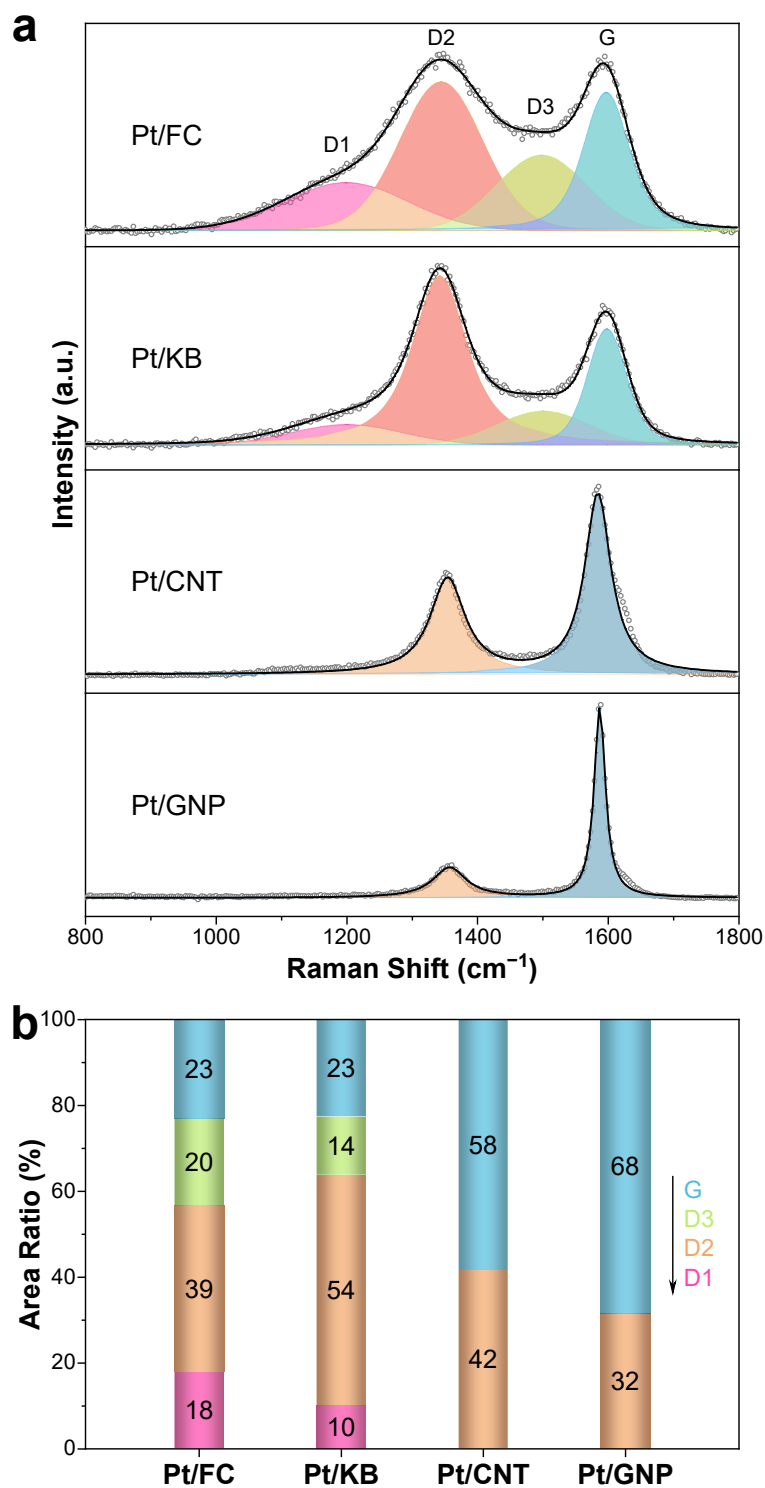

**Figure S1.** (a) Deconvolution of the Raman spectra of the carbon supported Pt NPs into D1, D2, D3, and G bands. (b) Corresponding areal ratios of the four deconvoluted bands.

The D1 band stems from polyene-like species <sup>[S4]</sup>, the D2 band results from edge-situated C and C(sp<sup>3</sup>) atoms <sup>[S5,6]</sup>, and the D3 band originates from pentagons and heteroatoms <sup>[S7-9]</sup>.

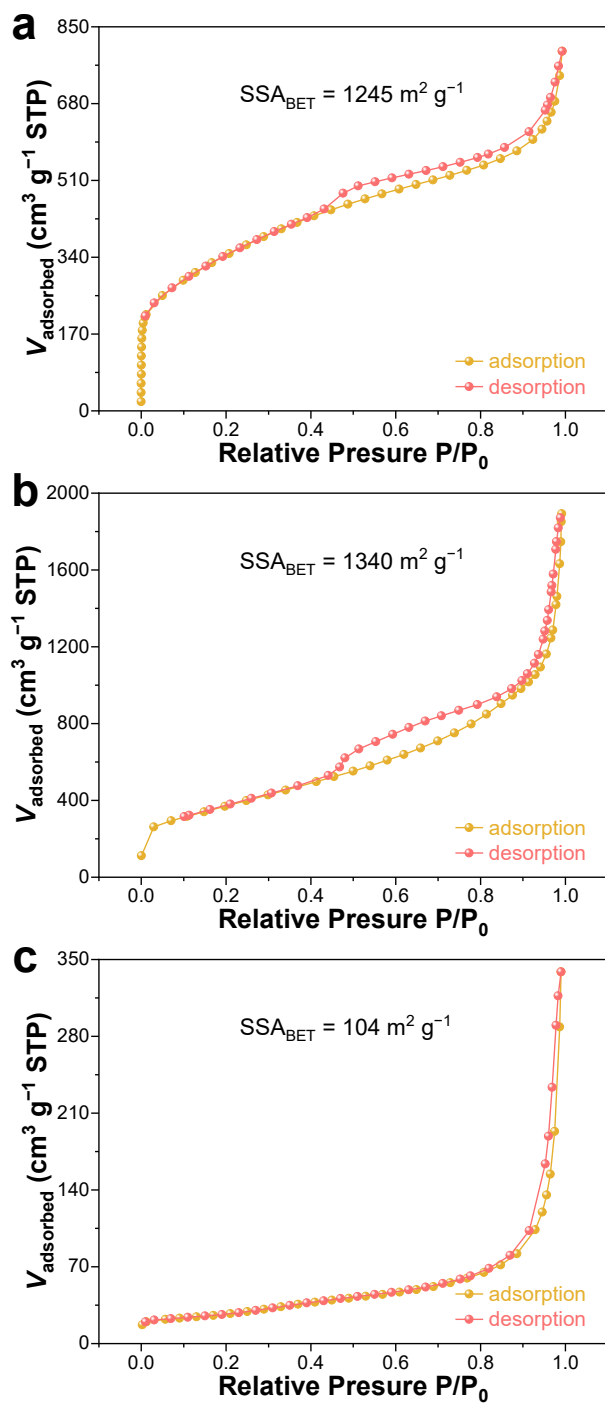

**Figure S2.**  $\text{N}_2$  adsorption–desorption isotherms and corresponding BET SSAs of FC (a), KB (b), and CNT (c).

*According to the supplier of GNP, its BET SSA is in the range of 200~300  $\text{m}^2 \text{ g}^{-1}$ .*

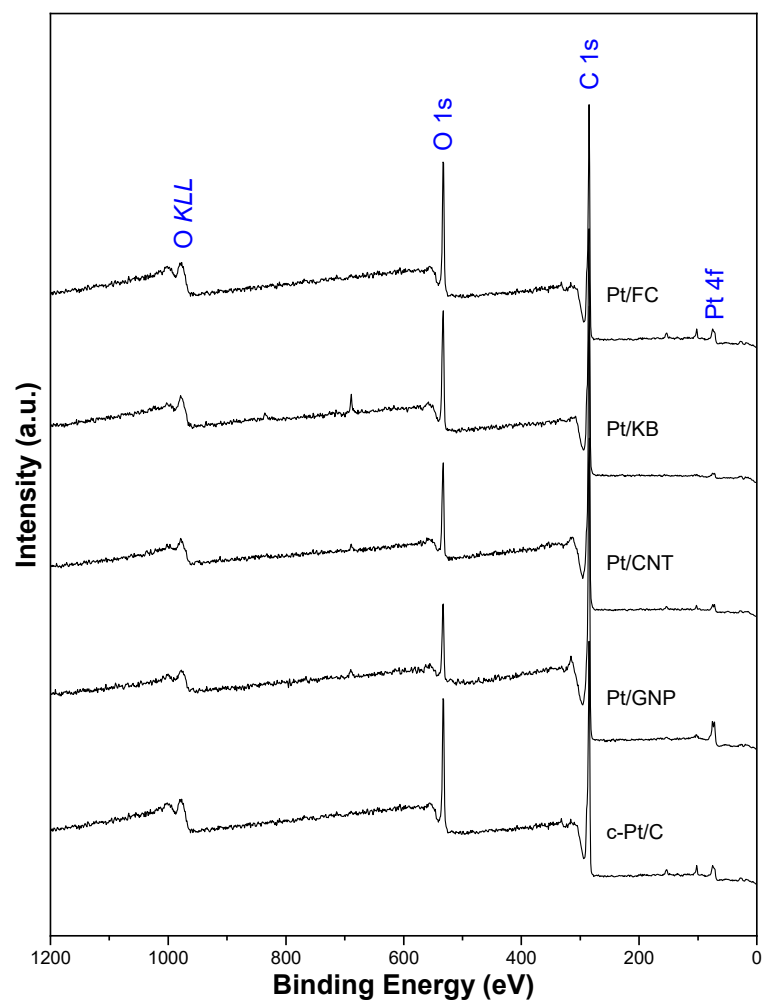

**Figure S3.** Full-survey XPS spectra of Pt/FC, Pt/KB, Pt/CNT, Pt/GNP, and c-Pt/C.

**Table S1.** The elemental contents of C and Pt from the XPS measurements.

|        | C     |       | Pt   |      |
|--------|-------|-------|------|------|
|        | at.%  | wt.%  | at.% | wt.% |
| Pt/FC  | 99.37 | 90.66 | 0.63 | 9.34 |
| Pt/KB  | 99.36 | 90.53 | 0.64 | 9.47 |
| Pt/CNT | 99.41 | 91.20 | 0.59 | 8.80 |
| Pt/GNP | 99.40 | 91.07 | 0.60 | 8.93 |

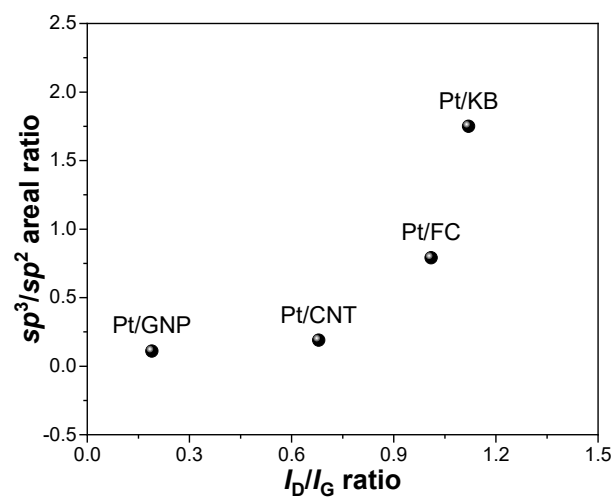

**Figure S4.** The correlation between  $I_D/I_G$  ratio and  $sp^3/sp^2$  areal ratio of Pt/FC, Pt/KB, Pt/CNT, and Pt/GNP.

**Table S2.** Comparison of ORR activity of Pt/FC in this study with recently reported Pt-based catalysts in alkaline electrolytes.

| Catalyst                                                                     | Electrolyte | $E_{1/2}$ (V vs RHE) | Reference  |
|------------------------------------------------------------------------------|-------------|----------------------|------------|
| Pt/FC                                                                        | 0.1 M KOH   | 0.882                | This study |
| Pt <sub>NC</sub> /Fe <sub>SA</sub> -NC                                       | 0.1 M KOH   | 0.86                 | [S10]      |
| Pt/PCNF                                                                      | 0.1 M KOH   | 0.927                | [S11]      |
| Pt <sub>SA</sub> -PtCo NCs/N-CNTs-900                                        | 0.1 M KOH   | 0.86                 | [S12]      |
| Pt@Fe-N-C                                                                    | 0.1 M KOH   | 0.86                 | [S13]      |
| Pt <sub>1</sub> -CuO <sub>x</sub> /Cu                                        | 0.1 M KOH   | 0.92                 | [S14]      |
| Mn-Pt/NKB                                                                    | 0.1 M KOH   | 0.89                 | [S15]      |
| Pt-rich Pt/Ni nanodendrites                                                  | 1 M KOH     | 0.88                 | [S16]      |
| PtCo <sub>3</sub> /NC                                                        | 0.1 M KOH   | 0.82                 | [S17]      |
| ea-Pt/a-TiO <sub>x</sub> /[Ti <sub>2</sub> O] <sup>2+</sup> ·2e <sup>-</sup> | 0.1 M KOH   | 0.82                 | [S18]      |
| Pt@Mn-SAs/N-C                                                                | 0.1 M KOH   | 0.91                 | [S19]      |
| Pt/Fe-N-C                                                                    | 0.1 M KOH   | 0.86                 | [S20]      |
| Pt <sub>3</sub> Co@Pt-SAC                                                    | 0.1 M KOH   | 0.86                 | [S21]      |
| Pt <sub>1</sub> -N/BP                                                        | 0.1 M KOH   | 0.87                 | [S22]      |
| SA-PtCoF                                                                     | 1 M KOH     | 0.88                 | [S23]      |

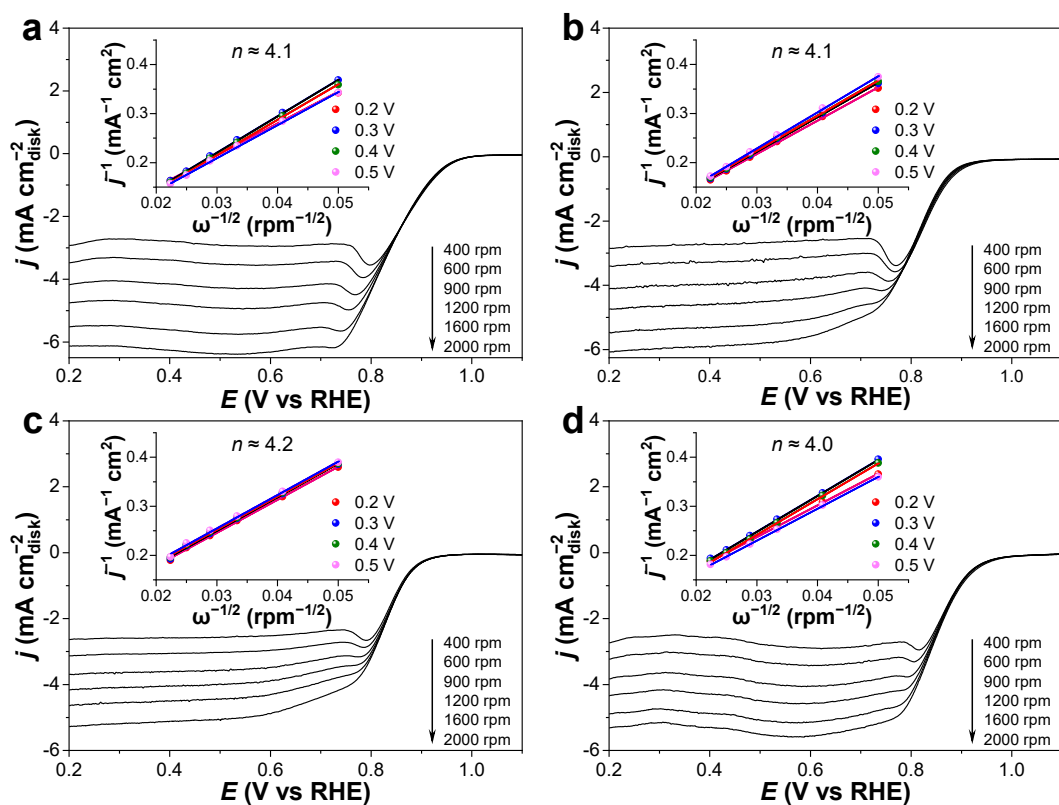

**Figure S5.** ORR polarization plots at different rotating speeds of 400–2000 rpm and the derived K–L plot (insets) and average  $n$  values of Pt/KB (a), Pt/CNT (b), Pt/GNP (c), and c-Pt/C (d).

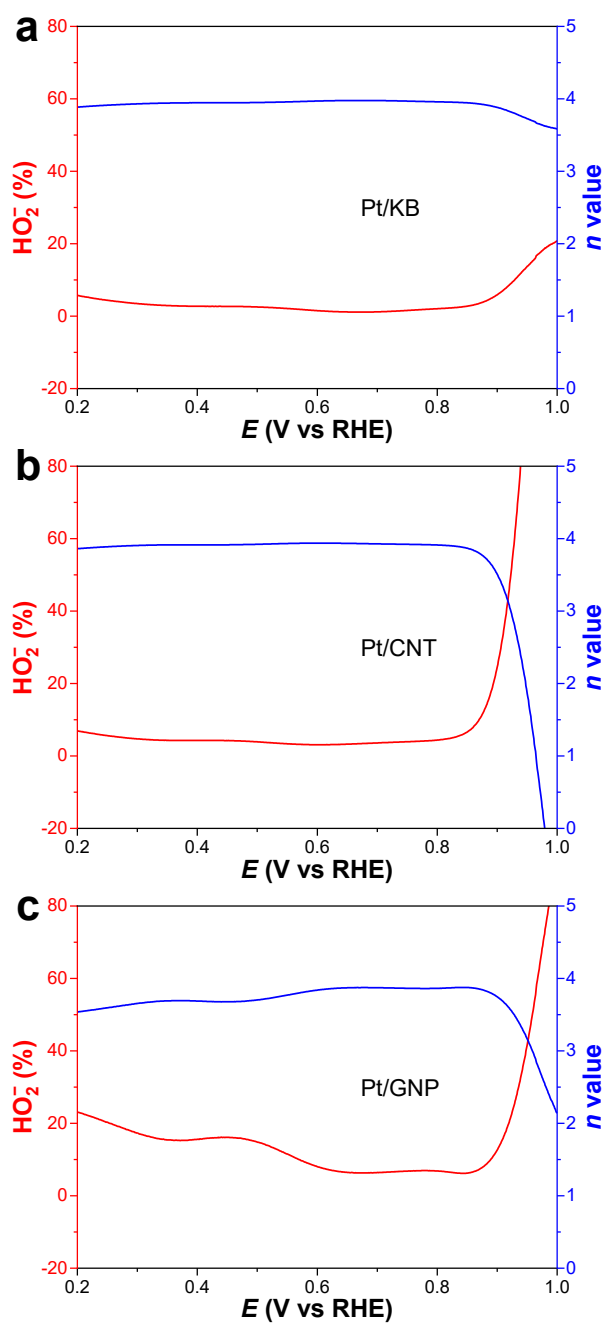

**Figure S6.**  $\text{HO}_2^-$  yield and  $n$  value derived from the RRDE tests of Pt/KB (a), Pt/CNT (b), and Pt/GNP (c).

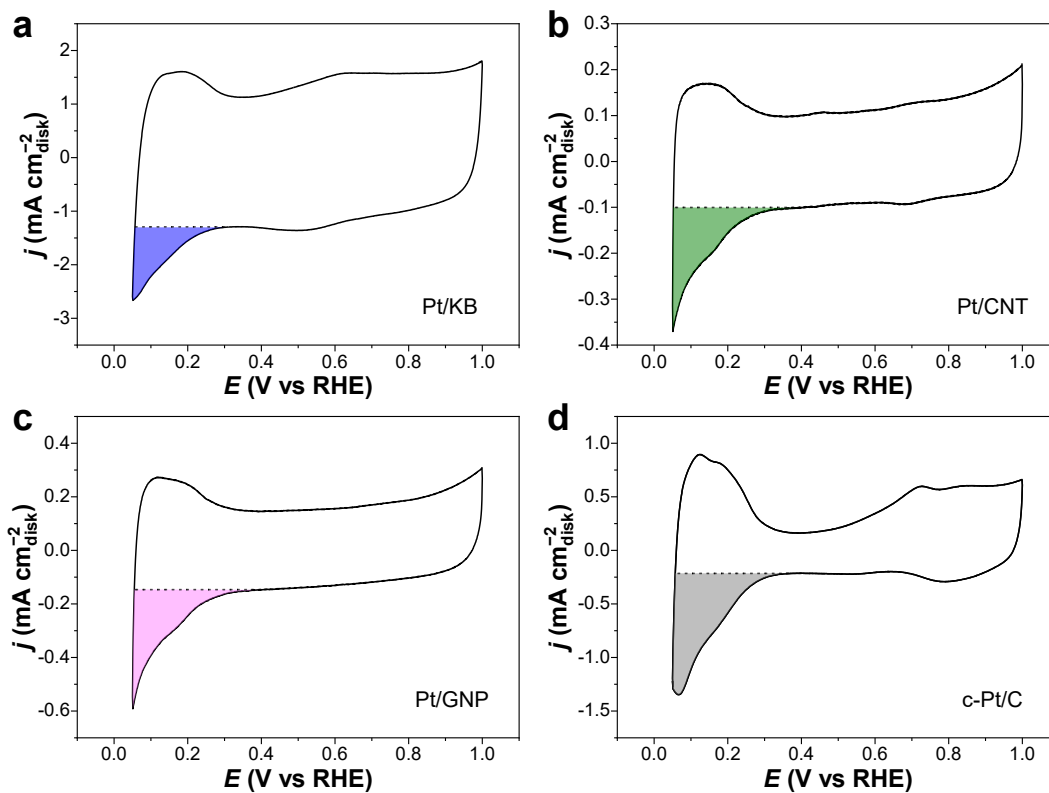

**Figure S7.** CV curves of Pt/KB (a), Pt/CNT (b), Pt/GNP (c), and c-Pt/C (d) in Ar-saturated HClO<sub>4</sub>. The colored area denoting the hydrogen adsorption region is integrated for ECSA calculation.

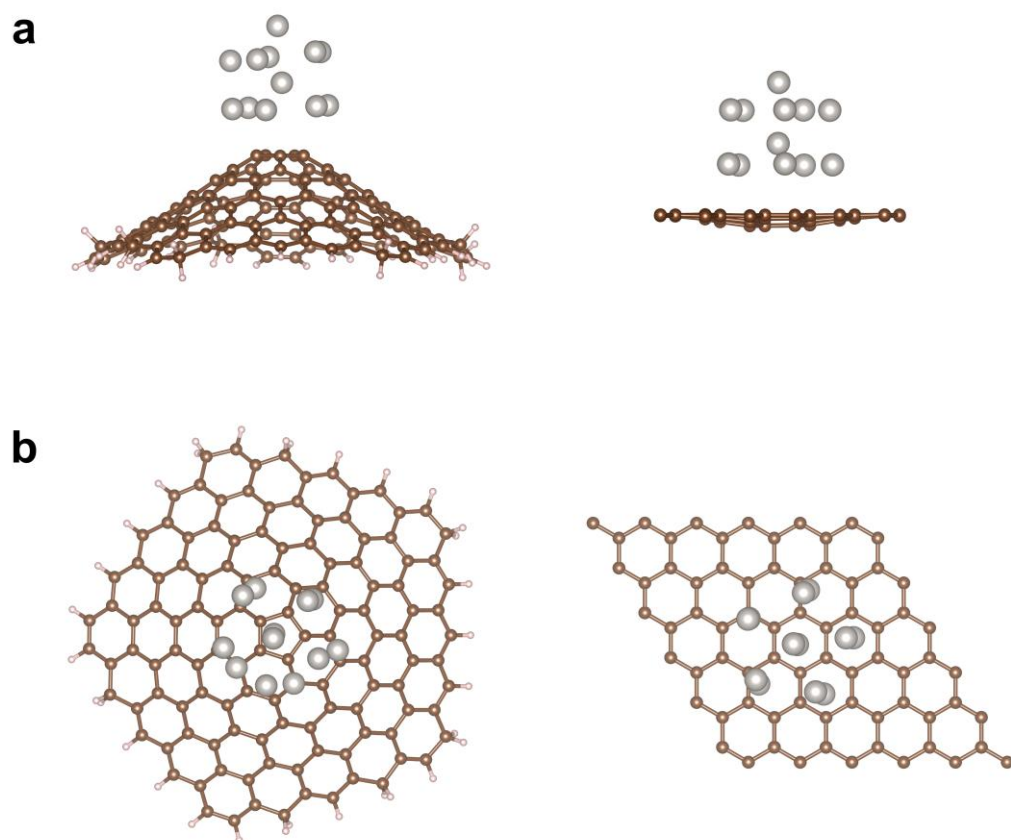

**Figure S8.** Front (a) and top (b) views of the atomic models of a Pt<sub>12</sub> cluster supported on graphene with (left) and without (right) a pentagon defect.

**Table S3.** Comparison of the transferred electron numbers of the five Pt atoms that are adjacent to the graphene support with and without pentagon.

|                  | 1 <sup>st</sup> Pt  | 2 <sup>nd</sup> Pt  | 3 <sup>rd</sup> Pt  | 4 <sup>th</sup> Pt  | 5 <sup>th</sup> Pt  |
|------------------|---------------------|---------------------|---------------------|---------------------|---------------------|
| with pentagon    | 0.07 e <sup>-</sup> | 0.13 e <sup>-</sup> | 0.11 e <sup>-</sup> | 0.11 e <sup>-</sup> | 0.07 e <sup>-</sup> |
| without pentagon | 0.07 e <sup>-</sup> | 0.10 e <sup>-</sup> | 0.04 e <sup>-</sup> | 0.09 e <sup>-</sup> | 0.05 e <sup>-</sup> |

## References

- [S1] G. Kresse, J. Furthmuller, *Phys. Rev. B* **1996**, *54*, 11169.
- [S2] G. Kresse, D. Joubert, *Phys. Rev. B* **1999**, *59*, 1758.
- [S3] J.P. Perdew, K. Burke, M. Ernzerhof, *Phys. Rev. Lett.* **1996**, *77*, 3865.
- [S4] A. Sadezky, H. Muckenhuber, H. Grothe, R. Niessner, U. Pöschl, *Carbon* **2005**, *43*, 1731.
- [S5] G. Katagiri, H. Ishida, A. Ishitani, *Carbon* **1988**, *26*, 565.
- [S6] Y. Wang, D.C. Alsmeyer, R.L. McCreery, *Chem. Mater.* **1990**, *2*, 557.
- [S7] M. Ramm, M. Ata, K.W. Brzezinka, T. Gross, W. Unger, *Thin Solid Films* **1999**, *354*, 106.
- [S8] M. Baibarac, L. Mihut, N. Preda, I. Baltog, J.Y. Mevellec, S. Lefrant, *Carbon* **2005**, *43*, 1.
- [S9] G. Wu, C.M. Johnston, N.H. Mack, K. Artyushkova, M. Ferrandon, M. Nelson, J.S. Lezama-Pacheco, S.D. Conradson, K.L. More, D.J. Myers, P. Zelenay, *J. Mater. Chem.* **2011**, *21*, 11392.
- [S10] C.Y. Du, Z.Q. Ge, L.H. Ouyang, H.Y. Xu, H.Y. Ma, X.T. Wang, Z.Q. Liu, *Angew. Chem. Int. Ed.* **2026**, *65*, e15517.
- [S11] Z. Han, W. Deng, Y. Song, H. Cao, Y. Shen, Z. Dang, Z. Zheng, J. Guo, *Carbon* **2026**, *246*, 120950.
- [S12] W. Chen, X. Zhu, W. Wei, H. Chen, T. Dong, R. Wang, M. Liu, K. Ken Ostrikov, P. Peng, S.Q. Zang, *Small* **2023**, *19*, 2304294.
- [S13] J. Yang, S. Song, Z. Chen, B. Zhang, Y. Guo, Y. Guo, H. Zhang, *J. Mater. Chem. A* **2025**, *13*, 6020.
- [S14] W. Zhou, B. Li, X. Liu, J. Jiang, S. Bo, C. Yang, Q. An, Y. Zhang, M.A. Soldatov, H. Wang, S. Wei, Q. Liu, *Nat. Commun.* **2024**, *15*, 6650.
- [S15] L. Gao, Y. Song, X. Xu, C. Li, C. Hu, *Nano Res.* **2024**, *17*, 7126.
- [S16] S. Ming, S.J. Cobb, M. Rahaman, N. Sammy, E. Reisner, A.E.H. Wheatley, *Adv. Funct. Mater.* **2024**, *34*, 2411006.
- [S17] X. Chen, J. Guo, D. Qian, J. Wu, W. Liao, G.I.N. Waterhouse, J. Liu, *Small* **2024**, *20*, 2403894.
- [S18] E. Hua, S. Choi, S. Ren, S. Kim, G. Ali, S.J. Kim, W.S. Jang, S. Joo, J. Zhang, S. Ji, Y.S. Cho, J. Kang, T. Song, S. Hong, H. Choi, Y.M. Kim, H. Han, S.W. Kim, *Energy Environ. Sci.* **2023**, *16*, 4464.
- [S19] L. Gong, J. Zhu, F. Xia, Y. Zhang, W. Shi, L. Chen, J. Yu, J. Wu, S. Mu, *ACS Catal.* **2023**, *13*, 4012.
- [S20] F. Xiao, Y. Wang, G.-L. Xu, F. Yang, S. Zhu, C.-J. Sun, Y. Cui, Z. Xu, Q. Zhao, J. Jang, X. Qiu, E. Liu, W.S. Drisdell, Z. Wei, M. Gu, K. Amine, M. Shao, *J. Am. Chem. Soc.* **2022**, *144*, 20372.
- [S21] B. Liu, R. Feng, M. Busch, S. Wang, H. Wu, P. Liu, J. Gu, A. Bahadoran, D. Matsumura, T. Tsuji, D. Zhang, F. Song, Q. Liu, *ACS Nano* **2022**, *16*, 14121.
- [S22] X. Zhu, X. Tan, K.H. Wu, S.C. Haw, C.W. Pao, B.J. Su, J. Jiang, S.C. Smith, J.M. Chen, R. Amal, X. Lu, *Angew. Chem. Int. Ed.* **2021**, *60*, 21911.
- [S23] Z. Li, W. Niu, Z. Yang, N. Zaman, W. Samarakoon, M. Wang, A. Kara, M. Lucero, M.V. Vyas, H. Cao, H. Zhou, G.E. Sterbinsky, Z. Feng, Y. Du, Y. Yang, *Energy Environ. Sci.* **2020**, *13*, 884.
